# Supplementary material
Source: PubMed Central journal article supplement (PMC3213417)
Supplement: tjp0589-4697-SD1.pdf [file tjp0589-4697-SD1.pdf]

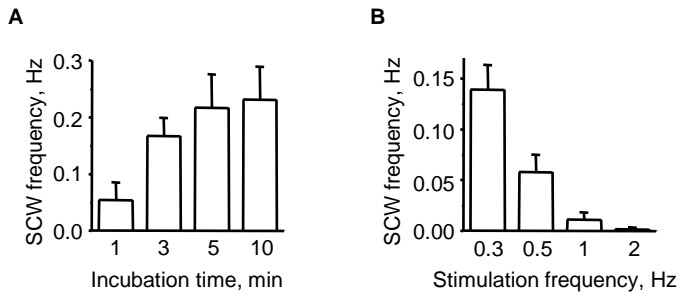

**Supplemental Fig. S1 : Concentration, frequency and time dependency of digitoxin-induced proarrhythmic effects. A,** bar graph of the frequency of SCWs in various digitoxin incubation times. **B,** pooled data for the number of SCWs at different pacing frequencies. Data are means  $\pm$  SE from 5 to 48 cells from 2 to 4 heart preparations. \* $P < 0.05$  vs control.

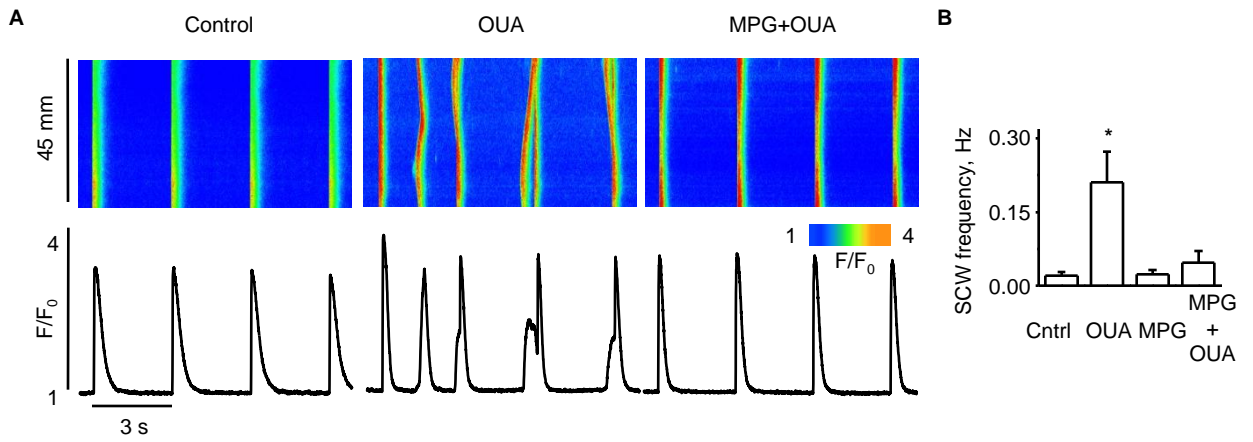

**Supplemental Fig. S2 : The ROS scavenger, MPG, reverses the alterations in myocyte  $Ca^{2+}$  handling caused by ouabain.** **A**, representative line-scan images (top) and time-dependent profiles (bottom) of spontaneous  $Ca^{2+}$  waves (SCWs) under control condition and in the presence of 100  $\mu$ M ouabain, or 100  $\mu$ M ouabain + 750  $\mu$ M MPG, as indicated. **B**, pooled data for frequency of SCWs. Data are means  $\pm$  SE from 10 to 35 cells from 6 heart preparations. \* $P < 0.05$  vs control.

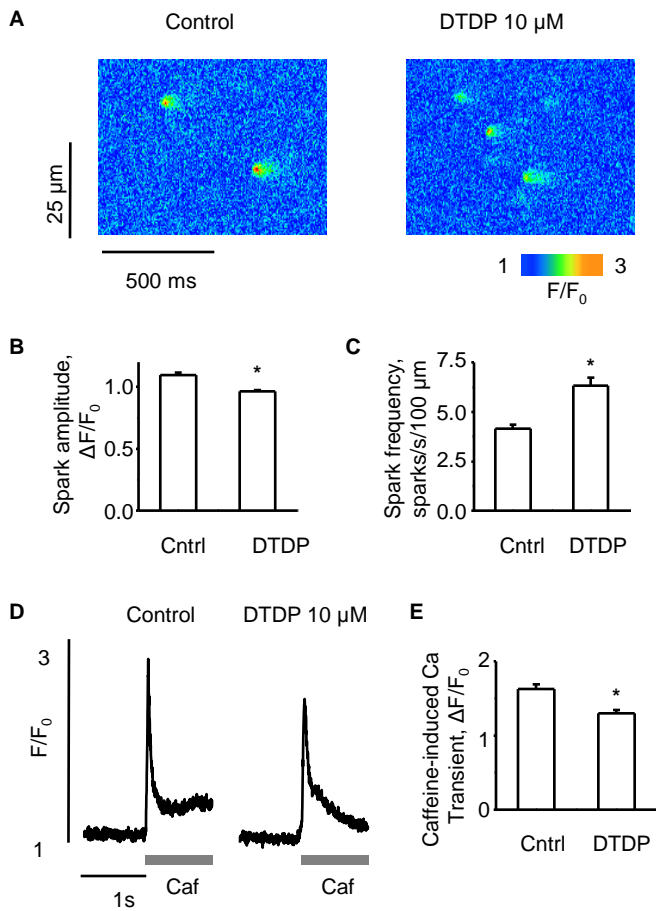

**Supplemental Fig. S3 : The oxidizing agent, DTDP, mimics the effects of CGs on  $Ca^{2+}$  sparks in permeabilized myocytes.** **A**, representative line-scan images of  $Ca^{2+}$  sparks in saponin-permeabilized myocytes under control condition and after pretreatment with 10  $\mu$ M DTDP, as indicated. **B**, **C**, bar graphs of the average amplitude and frequency of  $Ca^{2+}$  sparks for control and DTDP. **D**, representative traces of caffeine-induced  $Ca^{2+}$  transients. **E**, averaged amplitude of caffeine-induced  $Ca^{2+}$  transients for control and DTDP. Data are means  $\pm$  SE from 16 to 41 cells from 2 heart preparations. \* $P < 0.05$  vs control.
